# Supplementary material for: Association of circulating 25-hydroxyvitamin D levels with hypertension and blood pressure values in Korean adults: A Mendelian randomization study on a subset of the Korea National Health and Nutrition Survey 2011–2012 population
Source: PubMed Central journal article supplement — Nutr Res Pract. 2019 Aug 13;13(6):498–508. doi: 10.4162/nrp.2019.13.6.498 (PMC6883232; doi:10.4162/nrp.2019.13.6.498), 2019-08-13
Supplement: nrp-13-498-s001.pdf [file nrp-13-498-s001.pdf]

**Supplementary Table 1.** Characteristics of the study participants as per the genetic risk score

|                                                                        | Genetic risk score (5 SNP; 0-9) |                         |                          |                         | P-value <sup>†</sup> |
|------------------------------------------------------------------------|---------------------------------|-------------------------|--------------------------|-------------------------|----------------------|
|                                                                        | 0-3<br>(n = 769)                | 4<br>(n = 631)          | 5<br>(n = 541)           | 6-9<br>(n = 650)        |                      |
| Serum 25(OH)D levels (ng/mL)                                           | 16.4 ± 0.2 <sup>a</sup>         | 16.7 ± 0.2 <sup>a</sup> | 17.2 ± 0.2 <sup>ab</sup> | 17.6 ± 0.2 <sup>b</sup> | < 0.001              |
| <b>Lifestyle variables</b>                                             |                                 |                         |                          |                         |                      |
| Age (yrs)                                                              | 50.4 ± 0.5                      | 49.9 ± 0.6              | 50.8 ± 0.6               | 49.6 ± 0.6              | 0.520                |
| Male (% , n)                                                           | 46.9 (361)                      | 45.8 (289)              | 51.2 (277)               | 47.5 (309)              | 0.289                |
| Body mass index (kg/m <sup>2</sup> )                                   | 24.0 ± 0.1                      | 24.0 ± 0.1              | 24.2 ± 0.1               | 23.9 ± 0.1              | 0.330                |
| Education (elementary school/middle school/high school/university) (%) | 23.4/11.8/25.5/29.3             | 23.2/12.7/36.7/27.4     | 23.1/13.2/31.6/32.1      | 21.5/12.5/36.7/29.4     | 0.722                |
| Smoking status (never/former/sometimes/daily) (%)                      | 54.3/20.8/1.3/23.6              | 54.4/23.5/2.6/19.5      | 53.7/22.2/2.3/21.8       | 58.6/20.1/1.6/19.8      | 0.281                |
| Drinking experience (no/yes) (%)                                       | 12.2/87.8                       | 11.4/88.6               | 10.9/89.1                | 10.6/89.4               | 0.805                |
| Physical activity (% , n)                                              | 49.8 (376)                      | 42.2 (262)              | 44.2 (231)               | 45.4 (289)              | 0.034                |
| Use of antihypertensive medication (% , n)                             | 20.7 (155)                      | 21.8 (135)              | 21.1 (110)               | 21.1 (133)              | 0.970                |
| <b>Cardiovascular risk factors</b>                                     |                                 |                         |                          |                         |                      |
| TG (mg/dL)*                                                            | 137.4 ± 4.7                     | 140.6 ± 4.4             | 142.2 ± 4.8              | 133.0 ± 3.8             | 0.101                |
| TC (mg/dL)                                                             | 190.6 ± 1.3                     | 189.7 ± 1.4             | 188.1 ± 1.5              | 189.0 ± 1.4             | 0.615                |
| HDL-C (mg/dL)                                                          | 50.0 ± 0.5                      | 49.3 ± 0.5              | 48.5 ± 0.5               | 50.0 ± 0.5              | 0.105                |
| LDL-C (mg/dL)                                                          | 114.4 ± 1.2                     | 113.5 ± 1.3             | 112.3 ± 1.4              | 113.1 ± 1.2             | 0.700                |
| FBG (mg/dL)*                                                           | 99.0 ± 0.8                      | 98.7 ± 0.8              | 99.4 ± 0.8               | 99.3 ± 0.9              | 0.863                |
| HbA1c (%)*                                                             | 5.76 ± 0.03                     | 5.78 ± 0.03             | 5.78 ± 0.03              | 5.81 ± 0.03             | 0.582                |
| AST (IU/L)*                                                            | 23.8 ± 1.0                      | 22.8 ± 0.4              | 23.0 ± 0.5               | 22.7 ± 0.5              | 0.923                |
| ALT (IU/L)*                                                            | 22.2 ± 1.2                      | 22.4 ± 0.8              | 22.9 ± 0.7               | 22.9 ± 0.8              | 0.232                |

Values are expressed as means ± standard errors for continuous variables and number of counts and percentages for categorical variables.

<sup>†</sup> Statistical differences among genetic risk score groups were determined using one-way ANOVA with Bonferroni's multiple comparison for continuous variables and chi-squared test for categorical variables.

\* Tested after log-transformation.

TG, triglycerides; TC, total cholesterol; HDL-C, high-density lipoprotein cholesterol; LDL-C, low-density lipoprotein cholesterol; FBG, fasting blood glucose; HbA1c, glycosylated hemoglobin A1c; AST, aspartate aminotransferase; ALT, alanine aminotransferase.
