# Supplementary material for: Association of circulating 25-hydroxyvitamin D levels with hypertension and blood pressure values in Korean adults: A Mendelian randomization study on a subset of the Korea National Health and Nutrition Survey 2011–2012 population
Source: PubMed Central journal article supplement — Nutr Res Pract. 2019 Aug 13;13(6):498–508. doi: 10.4162/nrp.2019.13.6.498 (PMC6883232; doi:10.4162/nrp.2019.13.6.498), 2019-08-13
Supplement: nrp-13-498-s002.pdf [file nrp-13-498-s002.pdf]

**Supplementary Table 2.** Instrumental variable estimates of serum 25(OH)D levels to hypertension outcomes based on genetic risk scores (GRSs)

|                                  | Disease hypertension                         |         | Blood pressure                                                |         |                                                               |         |
|----------------------------------|----------------------------------------------|---------|---------------------------------------------------------------|---------|---------------------------------------------------------------|---------|
|                                  | OR (95% CI)<br>by IV estimation <sup>†</sup> | P-value | SBP (mmHg)                                                    |         | DBP (mmHg)                                                    |         |
|                                  |                                              |         | $\beta$ coefficient (95% CI)<br>by IV estimation <sup>†</sup> | P-value | $\beta$ coefficient (95% CI)<br>by IV estimation <sup>†</sup> | P-value |
| Genetic risk scores <sup>‡</sup> |                                              |         |                                                               |         |                                                               |         |
| GRS (5 SNPs; 0-9)                | 1.04 (0.90, 1.20)                            | 0.62    | -0.61 (-1.79, 0.57)                                           | 0.31    | -0.02 (-0.73, 0.70)                                           | 0.97    |
| wGRS (5 SNPs; 0-9.5)             | 1.04 (0.91, 1.19)                            | 0.60    | -0.42 (-1.51, 0.67)                                           | 0.45    | 0.001 (-0.67, 0.67)                                           | 0.99    |
| Synthesis score (3 SNPs; 0-6)    | 1.06 (0.88, 1.28)                            | 0.56    | -0.46 (-1.99, 1.08)                                           | 0.56    | 0.07 (-0.87, 1.01)                                            | 0.88    |
| Metabolism score (2 SNPs; 0-4)   | 0.99 (0.81, 1.23)                            | 0.96    | -0.92 (-2.70, 0.86)                                           | 0.31    | -0.19 (-1.24, 0.86)                                           | 0.72    |

<sup>†</sup> OR and  $\beta$  coefficients by IV estimation were obtained from IV regressions using two-stage least squares estimation method (in logistic regression models and in linear regression models, respectively), using individual genetic variants as instrument variables for serum 25(OH)D levels.

<sup>‡</sup> Genetic risk score (GRS) was calculated by summing the total number of circulating 25(OH)D level-increasing alleles. Weighted GRS (wGRS) was calculated by summing the total number of circulating 25(OH)D level-increasing alleles multiplied by their effect sizes, reported by Jiang, et al [30].

Synthesis score was calculated by summing the total number of circulating 25(OH)D level-increasing alleles in *DHCR7* (rs12785878) and *CYP2R1* (rs10741657, and rs12794714). Metabolism score was calculated by summing the total number of circulating 25(OH)D level-increasing alleles in *CYP24A1* (rs6013897) and *GC* (rs2282679). SBP, systolic blood pressure; DBP, diastolic blood pressure; OR, odds ratio; 95% CI, 95% confidence interval
